# Supplementary material for: A Direct Immunoassay Based on Surface-Enhanced Spectroscopy Using AuNP/PS-b-P2VP Nanocomposites
Source: MDPI journal article supplement (doi:10.3390/s23104810), 2023-05-16
Supplement: s1 [file s1]

## Supporting Information

# A Direct Immunoassay Based on Surface-Enhanced Spectroscopy Using AuNP/PS-*b*-P2VP Nanocomposites

Moyra F. Vieira <sup>1,2</sup>, Ana Livia de Carvalho Bovolato <sup>1</sup>, Bruno G. da Fonseca <sup>1</sup>, Celly M. S. Izumi <sup>2</sup>  
and Alexandre G. Brolo <sup>1,\*</sup>

<sup>1</sup> Department of Chemistry and Center for Advanced Materials and Related Technologies, University of Victoria, P.O. Box 3065, Victoria, BC V8W 3V6, Canada

<sup>2</sup> Departamento de Química, Instituto de Ciências Exatas, Universidade Federal de Juiz de Fora, Campus Universitário s/n, CEP, Juiz de Fora 36036-900, Brazil

\* Correspondence: agbrolo@uvic.ca

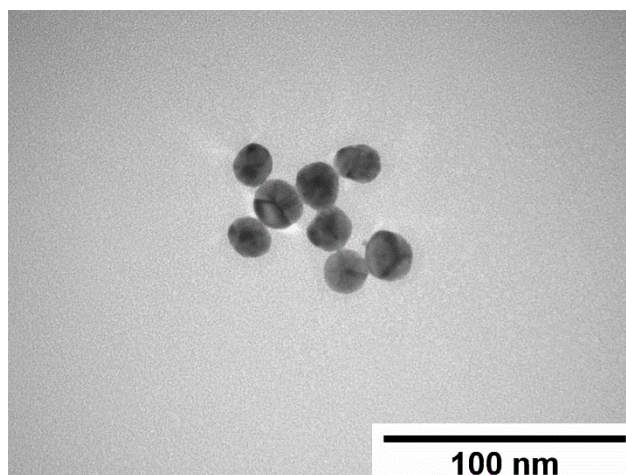

**Figure S1.** TEM image of the synthesized citrate stabilized gold NPs.

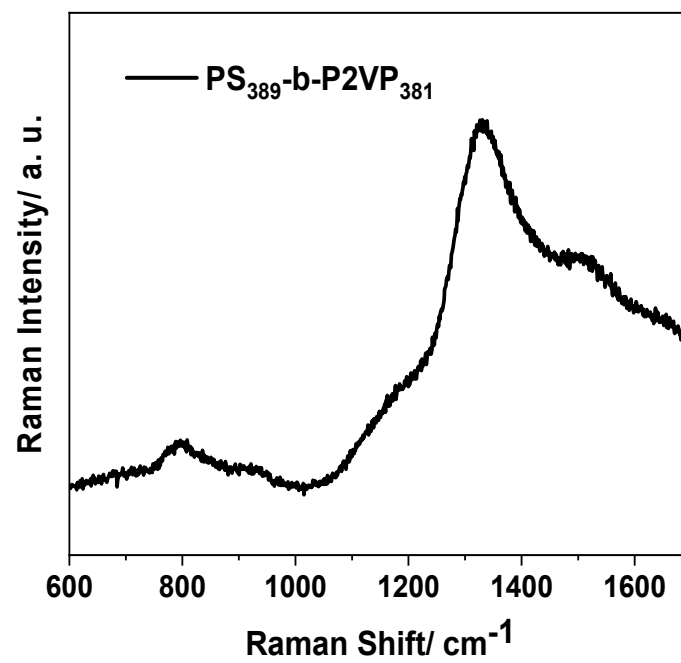

**Figure S2.** Raman spectra of the  $\text{PS}_{1250}\text{-b-P2VP}_{1285}$  thin film.

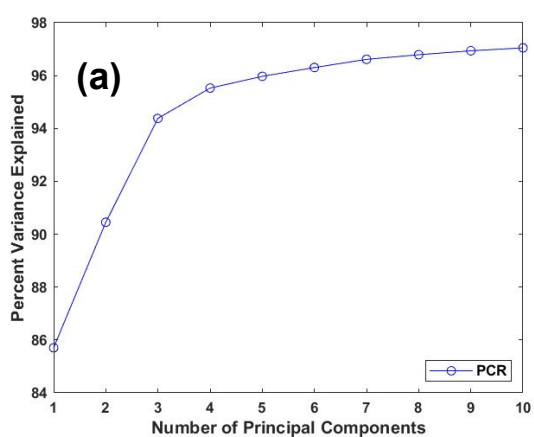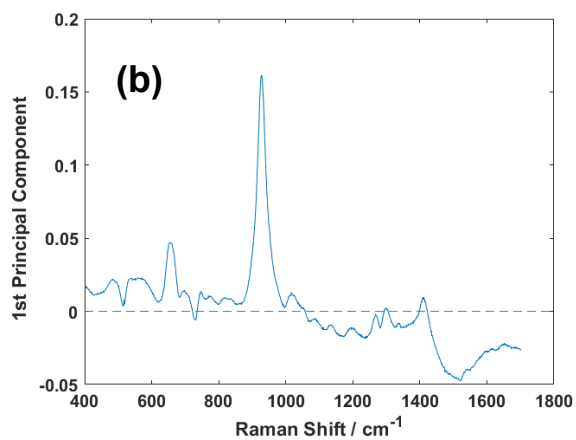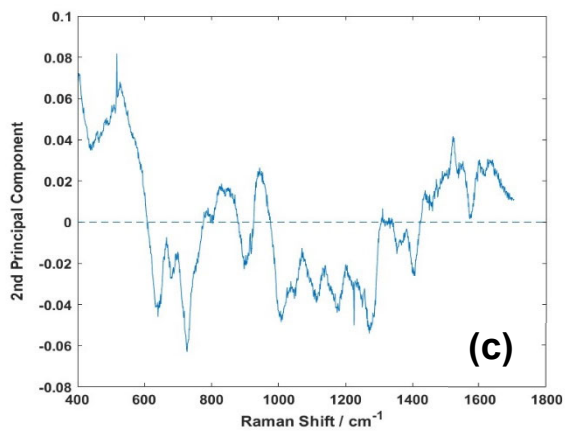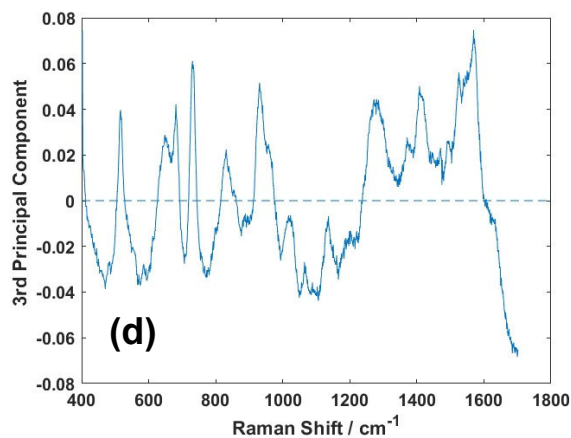

**Figure S3.** PCA of functionalization steps and IgG detection: (a) Explained Variation, (b) 1<sup>st</sup> principal component score, (c) 2<sup>nd</sup> principal component score, (d) 3<sup>rd</sup> principal component score.

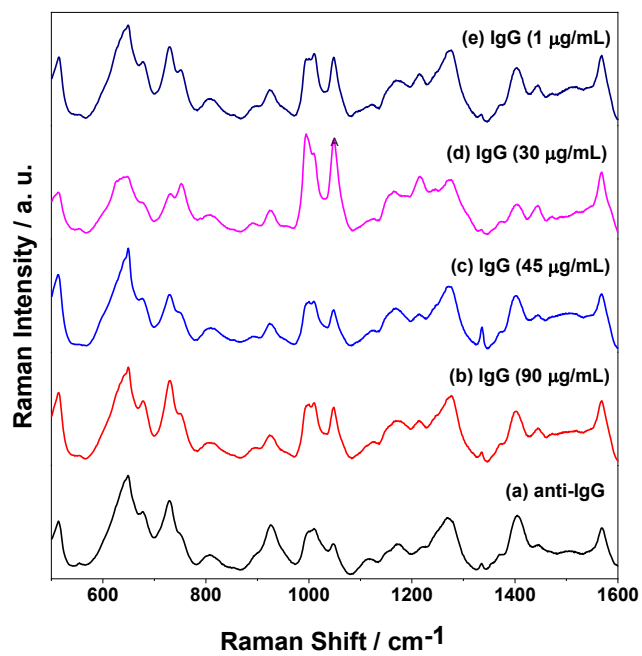

**Figure S4.** Average SERS spectra different concentrations of IgG (from 1 to 90  $\mu\text{g/mL}$ ).

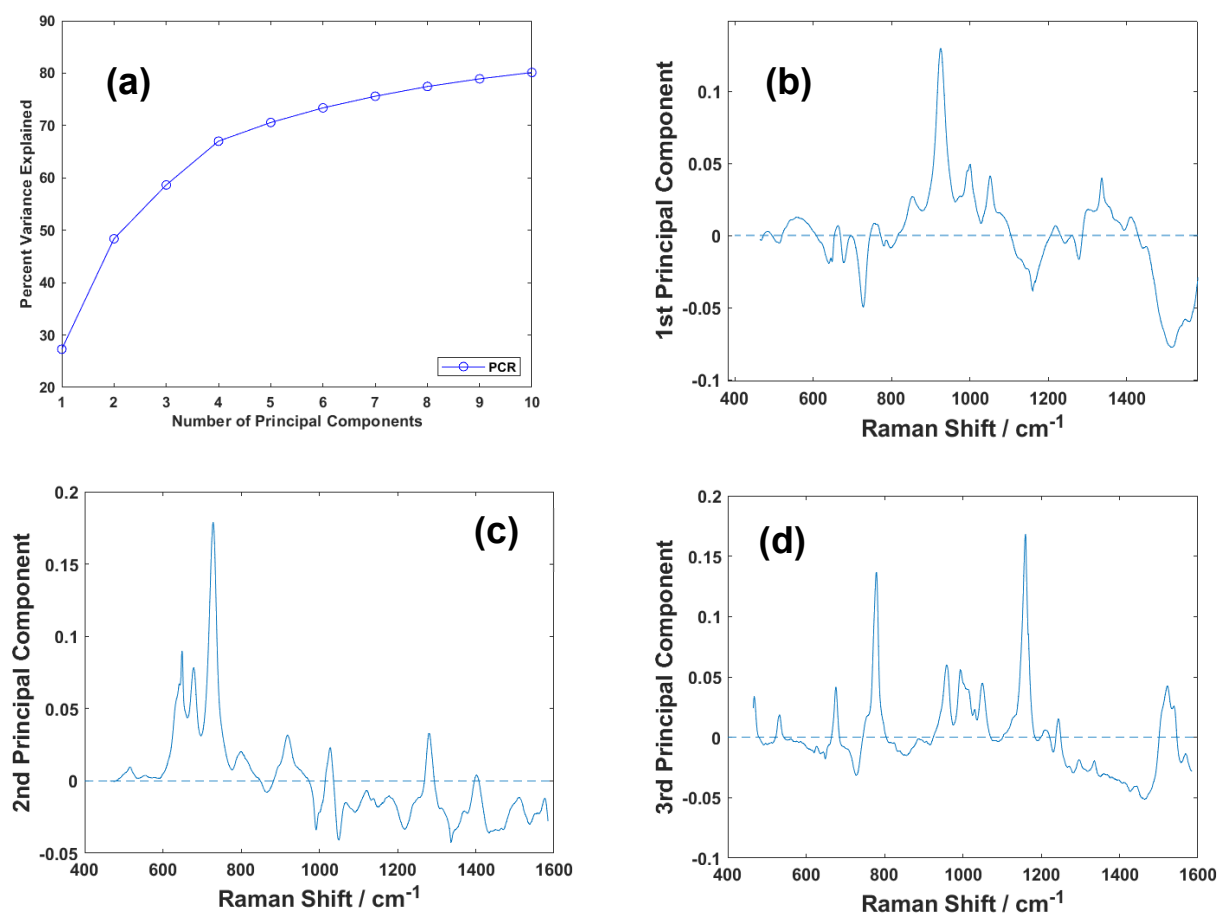

**Figure S5.** PCA of direct ATP immunoassay: (a) Explained Variation, (b) 1<sup>st</sup> principal component score, (c) 2<sup>nd</sup> principal component score, (d) 3<sup>rd</sup> principal component score.
